# Supplementary material for: Transfer Tiling of Nanostructures for Large-Area Fabrication
Source: MDPI journal article supplement (doi:10.3390/mi9110569), 2018-11-03
Supplement: s1 [file s1]

# Supplementary Materials: Transfer Tiling of Nanostructures for Large-Area Fabrication

Jaekyoung Kim, and Hyunsik Yoon

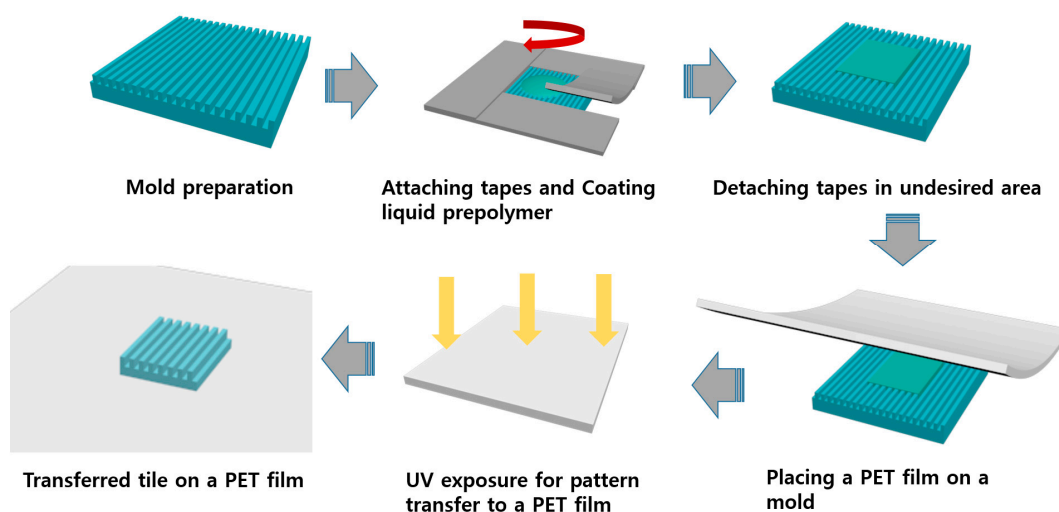

Figure S1. Experimental procedure using tape to define the tile shapes.

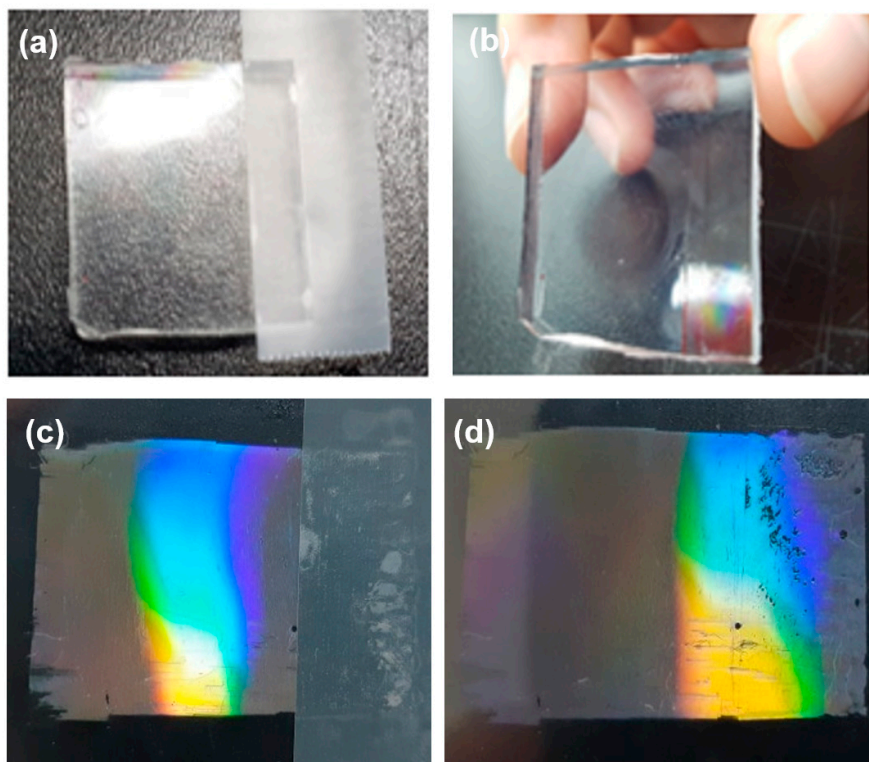

Figure S2. (a) A PDMS mold, with tape to remove the outside of the boundary. (b) The prepolymer, clearly removed by detaching the tape. (c) The PUA mold, adhered using tape. (d) The sticky residues remaining on the PUA mold.
